# Supplementary material
Source: PubMed Central journal article supplement (PMC5940433)
Supplement: jcsm.14.5.819s1.pdf [file jcsm.14.5.819s1.pdf]

**Table S1**—Change from baseline in non-motor symptoms in the three groups.

|                | 6 MONTHS           |                   |                  | 12 MONTHS       |                   |                  |
|----------------|--------------------|-------------------|------------------|-----------------|-------------------|------------------|
|                | OSA- (n=18)        | OSA+CPAP+ (n=30)  | OSA+CPAP- (n=11) | OSA- (n=17)     | OSA+CPAP+ (n=21)  | OSA+CPAP- (n=21) |
| <b>ESS</b>     | 2.6 (3.3) 0.005*   | -0.2 (5.1) 0.86   | -2.5 (4.7) 0.10  | 2.3 (4.1) 0.03* | -1.0 (3.3) 0.20   | -0.4 (4.1) 0.62  |
| <b>MOCA</b>    | -0.6 (2.4) 0.35    | 0.9 (2.8) 0.09    | -0.7 (4.9) 0.64  | -0.1 (2.2) 0.91 | 1.7 (3.5) 0.04*   | 0.3 (3.6) 0.68   |
| <b>UPDRS 1</b> | 1.3 (4.3) 0.20     | -2.7 (4.0) 0.001* | -1.2 (3.7) 0.32  | -0.3 (7.9) 0.88 | -4.1 (5.4) 0.002* | 1.4 (4.6) 0.18   |
| <b>PDSS</b>    | -8.1 (10.7) 0.005* | 7.9 (19.0) 0.03*  | 8.8 (18.0) 0.13  | 0.5 (16.7) 0.91 | 11.4 (24.4) 0.04* | -3.1 (13.8) 0.31 |
| <b>FSS</b>     | 0.5 (1.2) 0.11     | 0.0 (1.2) 0.99    | -0.7 (1.3) 0.09  | 0.2 (1.2) 0.46  | -0.4 (1.2) 0.11   | -0.1 (1.0) 0.67  |
| <b>Apathy</b>  | 2.4 (5.2) 0.07     | -0.3 (3.2) 0.62   | 0.2 (3.9) 0.88   | 1.4 (5.8) 0.33  | -1.4 (4.4) 0.17   | 1.2 (4.0) 0.18   |
| <b>BDI</b>     | 0.8 (5.8) 0.55     | -1.1 (3.5) 0.09   | -0.8 (3.3) 0.44  | -0.9 (7.3) 0.63 | -1.3 (5.8) 0.32   | -0.3 (5.1) 0.80  |
| <b>HADS-D</b>  | 1.2 (2.0) 0.03*    | -0.1 (2.5) 0.89   | -0.7 (2.7) 0.40  | -0.2 (3.0) 0.75 | -0.7 (3.3) 0.36   | 0.0 (1.9) 0.91   |
| <b>HADS-A</b>  | 1.1 (2.0) 0.04*    | -0.4 (3.3) 0.48   | -0.9 (2.5) 0.26  | 0.5 (3.1) 0.55  | -2.1 (3.8) 0.02*  | 0.7 (3.2) 0.34   |

Legend: Data as mean (SD), p for change from baseline (paired t-test). \* : p<0.05. ESS: Epworth Sleepiness Scale, a higher score reflects greater sleepiness; MoCA: Montreal Cognitive Assessment, a lower score reflects worse cognition; UPDRS 1: Unified Parkinson’s Disease Rating Scale part 1, a higher score reflects greater non-motor symptoms; PDSS: Parkinson’s Disease Sleep Scale, a lower score reflects poorer sleep quality; FSS: Fatigue Severity Scale, a higher score reflects greater fatigue; Apathy score: a higher score reflects greater apathy; HADS-A: Hospital Anxiety and Depression Scale – Anxiety, a higher score reflect greater anxiety; HADS-D: Hospital Anxiety and Depression Scale – Depression, a higher score reflects more depressive tendency. BDI: Beck Depression Inventory, a higher score reflects more depressive tendency.

**Table S2**—Change in individual UPDRS part 1 items.

|                                                | 6 MONTHS        |                   |                  | 12 MONTHS        |                   |                  |
|------------------------------------------------|-----------------|-------------------|------------------|------------------|-------------------|------------------|
|                                                | OSA- (n=18)     | OSA+CPAP+ (n=30)  | OSA+CPAP- (n=11) | OSA- (n=17)      | OSA+CPAP+ (n=21)  | OSA+CPAP- (n=21) |
| 1. Cognitive impairment                        | 0.4 (1.2) 0.13  | -0.3 (1.0) 0.36   | -0.3 (0.9) 0.51  | 0.25 (1.1) 0.39  | -0.3 (1.2) 0.20   | -0.3 (1.0) 0.29  |
| 2. Hallucinations and Psychosis                | 0.2 (0.5) 0.10  | -0.1 (0.6) 0.38   | 0.5 (0.8) 0.10   | 0.1 (0.6) 0.67   | -0.2 (0.6) 0.16   | 0.0 (0.9) 0.80   |
| 3. Depressed Mood                              | 0.3 (1.0) 0.62  | -0.4 (1.0) 0.08   | -0.4 (0.8) 0.59  | -0.1 (1.4) 0.86  | -0.5 (0.9) 0.02*  | 0.0 (0.7) 0.27   |
| 4. Anxious Mood                                | 0.3 (1.5) 0.44  | -0.6 (1.2) 0.03*  | -0.3 (0.7) 0.20  | -0.3 (1.3) 0.33  | -0.9 (1.0) 0.001* | 0.4 (0.9) 0.05*  |
| 5. Apathy                                      | 0.2 (1.3) 0.59  | -0.3 (0.8) 0.13   | -0.4 (0.7) 0.35  | -0.1 (1.4) 0.86  | -0.1 (1.0) 0.50   | 0.3 (0.8) 0.05*  |
| 6. Features of Dopamine Dysregulation Syndrome | -0.1 (0.9) 0.80 | 0.2 (0.8) 0.26    | 0.0 (0.9) 0.35   | -0.2 (0.8) 0.38  | 0.1 (0.8) 0.42    | 0.0 (0.8) 1.0    |
| 7. Sleep Problems                              | -0.4 (1.3) 0.23 | -0.5 (1.3) 0.13   | -0.2 (0.9) 0.51  | 0.1 (1.4) 0.86   | -0.2 (1.5) 0.49   | 0.3 (0.8) 0.09   |
| 8. Daytime Sleepiness                          | 0.0 (0.9) 1.0   | -0.4 (0.7) 0.009* | -0.5 (0.7) 0.10  | -0.5 (0.8) 0.03* | -0.5 (1.1) 0.07   | -0.1 (0.9) 0.82  |
| 9. Pain and Other Sensations                   | 0.4 (1.4) 0.25  | -0.2 (1.2) 0.46   | -0.1 (1.2) 0.81  | -0.2 (1.1) 0.41  | -0.2 (1.8) 0.55   | 0.0 (1.0) 0.83   |
| 10. Urinary Problems                           | 0.2 (0.9) 0.45  | -0.1 (0.8) 0.50   | -0.3 (1.1) 0.59  | -0.2 (1.1) 0.39  | -0.2 (0.8) 0.20   | -0.1 (1.0) 0.82  |
| 11. Constipation Problems                      | 0.2 (0.5) 0.10  | 0.2 (0.7) 0.11    | 0.0 (0.6) 0.59   | 0.2 (0.7) 0.16   | 0.1 (0.9) 0.48    | 0.0 (1.0) 0.65   |
| 12. Light-Headedness on Standing               | -0.1 (1.1) 0.83 | -0.4 (1.0) 0.04*  | 0.0 (0.6) 1.0    | -0.2 (1.0) 0.33  | -0.6 (0.9) 0.006* | 0.1 (1.2) 0.72   |
| 13. Fatigue                                    | -0.4 (0.8) 0.08 | -0.3 (0.8) 0.06   | -0.1 (0.8) 0.73  | -0.4 (0.7) 0.03* | -0.6 (1.2) 0.04*  | 0.3 (0.8) 0.11   |

Legend: Data as mean (SD), p for change from baseline (paired t-test). \* : p<0.05. P values are not corrected for multiple comparisons.
